# Supplementary material for: Remarkable solid-state proton conduction in sulfur- and nitrogen-functionalized few-layer graphene
Source: Royal Society of Chemistry journal article supplement (doi:10.1039/d5cc01752a), 2025-01-01
Supplement: d5cc01752a1.pdf [file d5cc01752a1.pdf]

## Electronic Supplementary Information

### Remarkable solid-state proton conduction in sulfur- and nitrogen-functionalized few-layer graphene

Sweety Gupta and Amit Paul\*

Department of Chemistry, Indian Institute of Science Education and Research (IISER) Bhopal, Madhya Pradesh, India 462066

| Figure/Table | Content                                                                                                                          | Page Number |
|--------------|----------------------------------------------------------------------------------------------------------------------------------|-------------|
|              | Chemicals                                                                                                                        | S2          |
|              | Characterization                                                                                                                 | S2-S3       |
|              | Synthesis                                                                                                                        | S3-S4       |
| Figure S1    | Fitted PXRD spectra and discussion                                                                                               | S4-S5       |
| Figure S2    | Fitting of Raman spectra                                                                                                         | S5          |
| Figure S3    | TGA of SNFG                                                                                                                      | S6          |
| Figure S4    | Nitrogen adsorption/desorption isotherm at 77K, (b) pore volume, and (c) pore size distribution calculated by using NLDFT method | S6-S7       |
| Figure S5    | Pressure dependent reversible water uptake in (a) GO and (b) SNFG.                                                               | S7          |
| Figure S6    | Two probe electrical conductivity measurement                                                                                    | S7-S8       |
| Figure S7    | Experimental Details of the Proton Conductivity Measurements                                                                     | S8-S9       |
| Figure S8    | Solid state proton conduction for different SNFG materials at 50 °C and 95 %RH.                                                  | S9          |
| Figure S9    | (a) Nyquist plot from 0 °C to 95 °C and (b) Arrhenius plot from lower temperature range (0 °C to 70 °C)                          | S9          |
| Figure S10   | Overlay of PXRD pattern at different measurement conditions                                                                      | S10         |
| Table S1     | % Composition of nitrogen and sulfur                                                                                             | S10         |

|           |                                                                                                |     |
|-----------|------------------------------------------------------------------------------------------------|-----|
| Table S2  | % Composition of deconvoluted C1s spectrum                                                     | S10 |
| Table S3  | % Composition of deconvoluted N1s spectrum                                                     | S11 |
| Table S4  | % Composition of deconvoluted O1s spectrum                                                     | S11 |
| Table S5  | % Composition of deconvoluted S 2p spectrum                                                    | S11 |
| Table S6  | TGA comparison of various graphene materials                                                   | S11 |
| Table S7  | Proton conductivity at different temperature in 40% RH                                         | S12 |
| Table S8  | Proton conductivity at different temperature in 95% RH                                         | S12 |
| Table S9  | Comparison of proton conductivity of present study with reported values of different materials | S13 |
| Table S10 | Comparison of proton conductivity before and after thermal annealing at 70 °C and 95 % RH      | S13 |
|           | References                                                                                     | S14 |

### Chemicals:

Graphite powder (particle size 150 microns, Cat# 496588), ammonia (25%,  $\text{NH}_4\text{OH}$ ), sodium hydrogen sulphite ( $\text{NaHSO}_3$ ), hydrogen peroxide (50%,  $\text{H}_2\text{O}_2$ ), and potassium permanganate ( $\text{KMnO}_4$ ) were purchased from Sigma-Aldrich, Merck. Chlorosulfonic acid ( $\text{ClHSO}_3$ ) was purchased from Alfa Aesar. Concentrated sulphuric acid ( $\text{H}_2\text{SO}_4$ ) and acetone were purchased from Pallav chemicals and Spectrochem, India, respectively. Solvents and reagents have been purchased from commercial sources and utilized directly without additional purification.

### Characterization:

Powder X-ray diffraction (PXRD) spectra of the GO and SNFG were recorded using PANalytical Empyrean XRD using  $\text{Cu K}\alpha$  radiation ( $1.54 \text{ \AA}$ ) in a  $2\theta$  range of  $5\text{-}80^\circ$ . Functional groups in SNFG were analysed using FT-IR spectroscopy. Spectra were collected using PerkinElmer Model UATR Spectrum

Two Instrument in the range of 500-4000  $\text{cm}^{-1}$ . X-ray photoelectron spectroscopy (XPS) experiments were performed using Thermofisher with scan time 1 h per element for core level scan (Energy band of 20 eV, with pass setting of 23.5 eV, 0.025 eV step, 100 ms time per step, 5 cycles). Percentage elemental composition was calculated and analyzed by a fully automated PC controlled elemental analyzer. The Raman spectra of the material was recorded by Lab RAM HR 800 (HORIBA) with exciting wavelength of 532.8 nm. For morphological study, SEM were performed using high-resolution field emission scanning electron microscope (HR-FESEM) Zeiss of model ULTRA Plus at 20 kV. For sample preparation, samples were spread on carbon tape and dried. TEM experiments were performed using FEI Talos F200X instrument at an accelerating voltage of 200 kV. Samples were prepared by drop-casting a 0.5 mg suspension in 150  $\mu\text{L}$  of isopropanol (IPA) onto a carbon-coated copper grid and allowing the solvent to evaporate under ambient conditions overnight. Thermal gravimetric analysis (TGA) was performed by Perkin Elmer TGA 4000 instruments in a temperature range from 30-900  $^{\circ}\text{C}$  at a scan rate of 10  $^{\circ}\text{C}/\text{min}$  with a  $\text{N}_2$  flow rate of 10 mL/min. Nitrogen adsorption/desorption studies were conducted to provide insights into the porous properties of SNFG materials. Before performing the experiment, sample was degassed under a vacuum at 80  $^{\circ}\text{C}$  for 24 h. Pressure dependent water S4 adsorption/desorption measurements were performed using Quantachrome Autosorb, QUA211011 analyser. Prior to measurement, powdered samples were degassed at 80  $^{\circ}\text{C}$  for 24 h and water was adsorbed in vapour form. For two probe electrical conductivity measurement, solid pellets were made from the respective material by pressing them under hydraulic pressure and placed in a Swagelok cell for solid-state I-V measurement. For solid state proton conductivity study, humidity and temperature conditions were controlled in an ESPEC temperature-humidity programmable chamber (model SH-222). Experiments were carried out in the frequency range of 1 MHz-1 Hz using a two-probe setup by using the SP-240 BioLogic instrument as a frequency analyser.

### **Synthesis:**

Sulfur- and nitrogen-functionalized few-layer graphene (SNFG) was synthesized from the precursor graphite oxide (GO). First, GO was prepared from graphite via a modified Hummer's method following a

method previously reported by our group without addition of  $\text{NaNO}_3$ .<sup>1</sup> Thereafter, GO was modified to nitrogen- and oxygen-functionalized few-layer graphene (NOFG-D) employing Bucherer method wherein GO was treated with ammonia and sodium bisulfite in hydrothermal at 210 °C for 5 h following a previously reported method by our group.<sup>2</sup> Afterward, 80 mg of NOFG-D was sonicated in 40 ml of DMF solvent for 30 min and then reacted with different volume of chlorosulfonic acid (3, 6 and 9 ml) in an ice bath. The solution was stirred for 24 h in room temperature. It was then filtered and washed with water to remove excess of acid to obtain sulfur- and nitrogen-functionalized few-layer graphene (SNFG). Depending on the amount of sulfonic acid added (3/6/9 ml) during synthesis, the materials were named as SNFG-3, SNFG-6 and SNFG-9. SNFG-9 was found to be the best proton conducting material and for simplicity, this material has been mentioned as SNFG in the main manuscript.

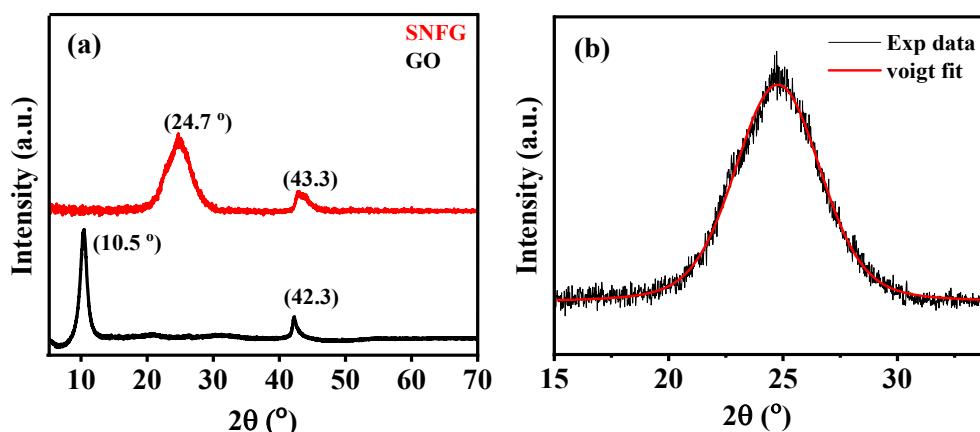

PXR  
D  
analy  
sis  
using  
Scher  
er

equation

**Figure S1:** (a) PXRD pattern of SNFG and GO. (b) Voigt function fitting of SNFG.

*Calculation for interlayer distance “d”:*

Using the Bragg's law:

$$n\lambda = 2d\sin \theta$$

where n is an integer

$\lambda$  = wavelength of incident light

d = interlayer distance

$$n = 1, \lambda = 1.54 \text{ \AA}, 2\theta = 24.8^\circ, \theta = 12.3^\circ$$

$$d = 1.54/2 \sin (12.3^\circ) = 3.6 \text{ \AA}$$

**Calculation for crystalline length ' $L_c$ ' and no. of layers ' $N$ ':**

Scherrer formula is,  $L_c = (K\lambda)/(\beta\cos\theta)$

K = dimensionless shape factor, typical value is 0.9 for  $L_c$ .

$\beta$  = line broadening at full width half maxima in radian =  $\beta$  was determined by Voigt fitting

$$\theta = 12.4 = 0.216 \text{ radian}$$

$$L_c = (0.90 \times 1.54) / (0.0765 \times \cos (0.216))$$

$$L_c = 17 \text{ \AA}$$

N = Number of layers

$$N = 17 / 3.6 \approx 5 \text{ layers}$$

**Raman spectra**

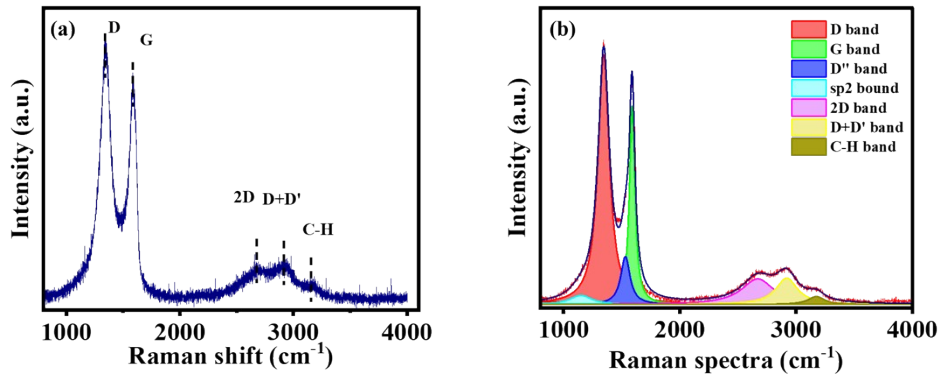

**Figure S2:** (a) Raman spectra of SNFG and (b) Fitting of Raman spectra.

One of the crucial methods for graphite material structure analysis is Raman spectroscopy for which Cançado et al. provided a suitable formula for computing the given grain size (Equation S1).<sup>3</sup>

$$L_a = (2.4 \times 10^{-10}) \lambda_{laser}^4 \left( \frac{I_D}{I_G} \right)^{-1} \dots (S1)^4$$

Hence,  $L_a$  in this study was  $= (2.4 \times 10^{-10} \times (532)^4) / 2.58 = 7.4 \text{ nm}$

Raman spectra of low frequency region was deconvoluted into four peaks (Figure S2a),  $sp^2$  bound, D-band, D'-band, and G-band at 1113, 1346, 1512, and 1590  $\text{cm}^{-1}$  respectively.<sup>5</sup> Similarly, fitting of the high-frequency region was deconvoluted into three peaks (Figure S2b), wherein peaks were centered at 2670, 2919, and 3173  $\text{cm}^{-1}$  reflected 2D-band, D+D' band, and C-H band respectively.<sup>6</sup>

## Thermo-gravimetric

## analysis (TGA)

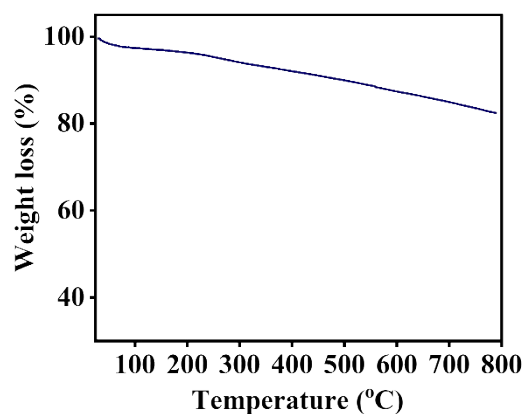

**Figure S3:** (a) TGA curve of SNFG.

## N<sub>2</sub> adsorption/desorption

## isotherm

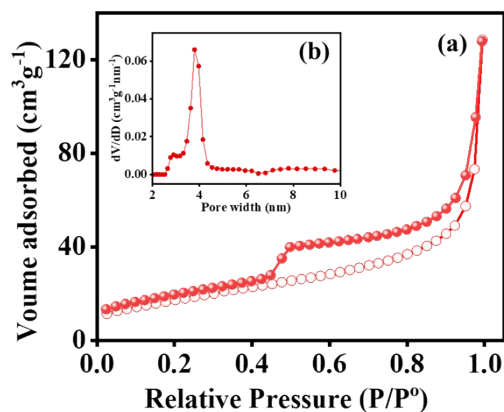

**Figure S4:** (a) Nitrogen adsorption/desorption isotherm at 77 K, (b) pore distribution using NLDFT method for SNFG.

N<sub>2</sub> adsorption/desorption profile for SNFG exhibited type-III/IV isotherm profile with hysteresis loop of H2 type (according to IUPAC classification) in the range of (0.45-1.0) for P/P<sub>0</sub>. These findings revealed the mesoporous nature of the material. BET surface area and pore volume were 63 m<sup>2</sup>/g and 0.12 cm<sup>3</sup>/g respectively. The pore width was in the range of 3.8 nm, calculated using the NLDFT method (inset Figure S4b).

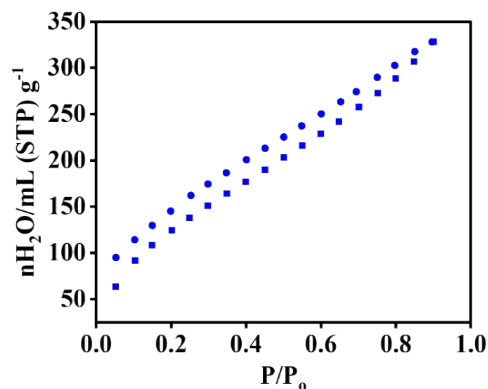

**Figure S5:** Pressure dependent reversible water uptake of SNFG.

### Two probe electrical conductivity measurement

The prepared solid pellets were placed in a Swagelok cell for solid-state  $I$ - $V$  measurement. Electrical conductivities were determined utilizing Equations S2-S4.  $R$  is the resistance calculated from the slope of the  $I$ - $V$  curve. “ $l$ ” and  $A$  are the thickness and area of the pellets ( $\pi r^2$ ), respectively.  $\kappa$  and  $\rho$  are conductivity and resistivity, respectively. Typically, the thickness and area of the pellets were 0.20 cm and 1.130 cm<sup>2</sup>, respectively.

$$V = IR \dots\dots\dots (S2)$$

$$R = \rho \frac{l}{A} \dots\dots\dots (S3)$$

$$\kappa = \frac{1}{\rho} \dots\dots\dots (S4)$$

In this study,  $\kappa$  was found to be  $6.6 \times 10^{-2} \text{ Scm}^{-1}$ , calculated using “ $l$ ”,  $A$  and  $R$  values.  $R$  was calculated from  $I$ - $V$  curve slope which was found to be  $2.67 \Omega$ .

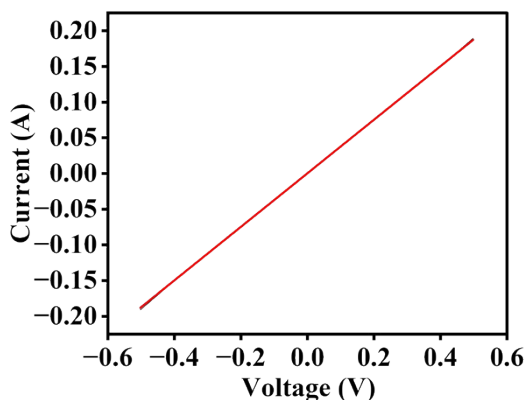

**Figure S6:** I-V curve of SNFG for electrical conductivity measurement.

### Experimental Details of the Proton Conductivity Measurements

50 mg of samples were finely ground and taken in a pellet maker. They were pressed with  $\sim 4$  tons of pressure in a hydraulic press to make uniform pellet of diameter 6 mm and thickness 0.8-0.9 mm. These pellets were tightly packed in two probe-measurement cell. For each experiment the sample pellets were pre-equilibrated overnight. For each temperature dependent study sample was equilibrated for two hours at each humidity condition. Proton conductivities were calculated using Equation S5.

$$\sigma = \frac{l}{R * A} \dots\dots\dots (S5)$$



wherein,  $\sigma$ ,  $L$ ,  $R$ , and  $A$  represent the proton conductivity ( $\text{S cm}^{-1}$ ), thickness (cm), resistance ( $\Omega$ ), and area of the pellet ( $\text{cm}^2$ ) ( $A = \pi r^2$ ,  $r$  is the radius of the pellet), respectively. Resistance ( $R$ ) was obtained by fitting the semicircle of the Nyquist plot in the high-frequency domain.

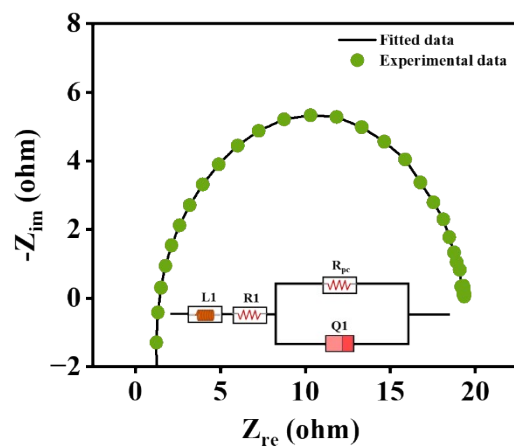

**Figure S7:** Experimental data fitting of Nyquist plot. Inset showing circuit diagram employed for fitting.

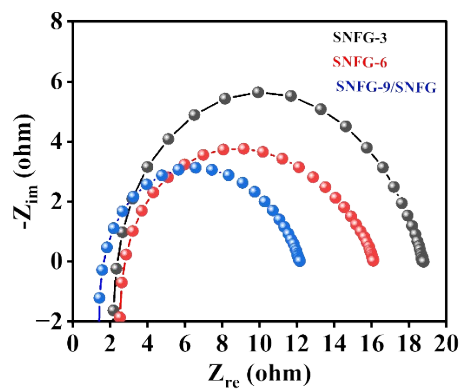

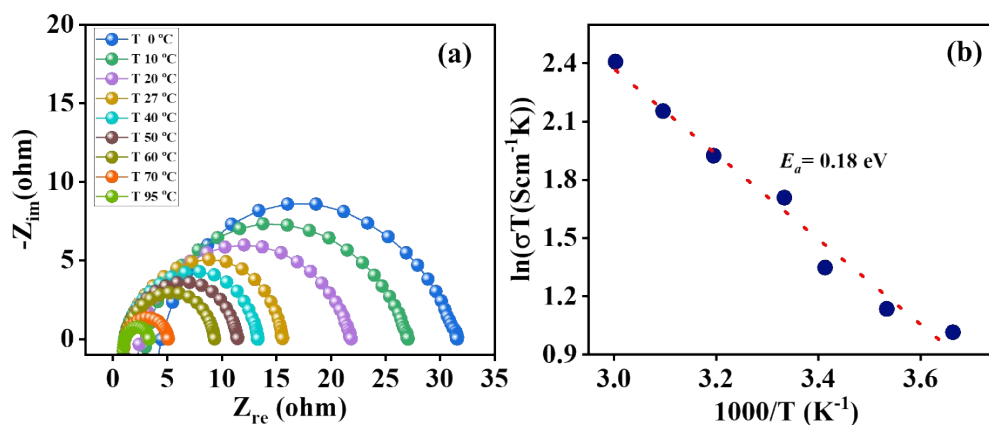

**Figure S8:** Solid state proton conduction for different SNFG materials at 50 °C and 95 %RH.

**Figure S9:** (a) Nyquist plot from 0 to 95 °C and (b) Arrhenius plot plots of  $\ln(\sigma \cdot T)$  vs  $T^{-1}$  for SNFG.

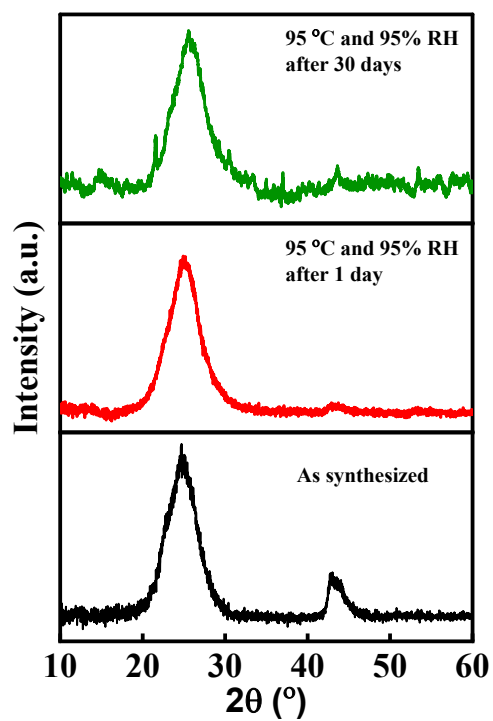

**Figure S10:** Overlay of PXRD pattern at different measurement conditions for SNFG.

**Table S1.** Percentage composition of nitrogen and sulfur for SNFG.

| Elements | XPS | CHNS |
|----------|-----|------|
| N Atm %  | 5.1 | 5.0  |
| S Atm %  | 0.6 | 0.7  |

**Table S2.** Percentage composition of different functionalization from deconvoluted C1s spectra of SNFG.

| Sample | C=C  | C-N  | C-OH | C=O  | O-C=O |
|--------|------|------|------|------|-------|
|        | 63.4 | 16.1 | 7.7  | 10.5 | 2.1   |

**Table S3.** Percentage composition of different functionalization from deconvoluted N1s spectra of SNFG.

| Sample | Primary -N | Pyridinic-N | Pyrrolic-N | Graphitic-N | N-oxide |
|--------|------------|-------------|------------|-------------|---------|
|        | 20.4       | 10.9        | 19.5       | 13.9        | 16.1    |

**Table S4.** Percentage composition of different functionalization from deconvoluted O1s spectra of SNFG.

| Sample | C=O | O=S=O | O=C-OH |
|--------|-----|-------|--------|
|        | 62  | 35.6  | 2.3    |

**Table S5.** Percentage composition of deconvoluted S 2p spectrum of SNFG.

| Sample | S 2p <sub>1/2</sub> | S 2p <sub>3/2</sub> |
|--------|---------------------|---------------------|
|        | 52.9                | 47.1                |

**Table S6.** TGA comparison of various graphene materials.<sup>7</sup>

| Sample | % Weight loss (500-800 °C) |
|--------|----------------------------|
| GO     | ~30                        |
| OFG    | ~70                        |
| NOFG   | ~32                        |
| NOFG-D | ~40                        |
| SNFG   | ~8.4                       |

**Table S7.** Proton conductivity at different temperature and 40% RH of SNFG.

| Temperature (°C) | Conductivity (S cm <sup>-1</sup> ) × 10 <sup>2</sup> |
|------------------|------------------------------------------------------|
| 27               | 1.15±0.15                                            |
| 40               | 1.24±0.08                                            |
| 50               | 1.35±0.05                                            |
| 60               | 1.47±0.24                                            |
| 70               | 1.79±0.05                                            |
| 80               | 2.37±0.12                                            |
| 95               | 4.61±1.90                                            |

**Table S8.** Proton conductivity at different temperature and 95% RH of SNFG.

| Temperature (°C) | Conductivity (S cm <sup>-1</sup> ) × 10 <sup>2</sup> |
|------------------|------------------------------------------------------|
| 0                | 1.01±0.07                                            |
| 10               | 1.09±0.10                                            |
| 20               | 1.31±0.12                                            |
| 27               | 2.75±0.05                                            |
| 40               | 3.15±0.05                                            |
| 50               | 3.45±0.25                                            |
| 60               | 3.68±0.36                                            |
| 70               | 4.10±0.50                                            |
| 80               | 5.70±0.50                                            |
| 95               | 8.65±1.95                                            |

**Table S9.** Comparison of proton conductivity of present study with reported values of different materials.

| Sample           | Proton conductivity (S cm <sup>-1</sup> ) | References                                                    |
|------------------|-------------------------------------------|---------------------------------------------------------------|
| GO               | $5.7 \times 10^{-3}$ (90 °C, 90% RH)      | <i>Electrochim. Acta</i> , 2019, <b>297</b> , 240-249         |
| sGO              | $9.1 \times 10^{-3}$ (90 °C, 90% RH)      |                                                               |
| GO (Bulk sample) | $4.0 \times 10^{-4}$ (27 °C, 60 % RH)     | <i>Angew. Chem. Int. Ed.</i> , 2014, <b>53</b> ,<br>6997-7000 |
| PEGO             | $1.0 \times 10^{-2}$ (80 °C, 60% RH)      | <i>Adv. Funct. Mater.</i> , 2015, <b>25</b> , 4480-<br>4485   |
| HRFG-96          | $3.9 \times 10^{-2}$ (95 °C, 95% RH)      | <i>J. Phys. Chem. C</i> , 2022, <b>126</b> , 6135-<br>6146    |

|           |                                                         |                                                                    |
|-----------|---------------------------------------------------------|--------------------------------------------------------------------|
| OFG       | $8.7 \times 10^{-3}$ (80 °C, 95% RH)                    | <i>Chem. Commun.</i> , 2016, <b>52</b> , 12661-12664               |
| 3DGO-NS   | $2.8 \times 10^{-1}$ (60 °C, 90% RH)                    | <i>ChemPlusChem</i> , 2022, <b>87</b> , e202200003                 |
| GO-HPS    | $1.5 \times 10^{-1}$ (RT, 80% RH)                       | <i>Chem. Asian J.</i> , 2017, <b>12</b> , 194-197                  |
| NOFG      | $3.6 \times 10^{-3}$ (95 °C, 95% RH)                    | <i>J. Phys. Chem. C</i> , 2022, <b>126</b> , 10534-10545           |
| IMBA-rGO2 | $3.9 \times 10^{-3}$ (40 °C, 90% RH)                    | <i>ACS Appl. Mater. Interfaces</i> , 2020, <b>12</b> , 10829-10838 |
| GO/FA     | $1.7 \times 10^{-2}$ (25 °C, 90% RH)                    | <i>RSC Adv.</i> , 2017, <b>7</b> , 21901-21905                     |
| SNFG      | <b><math>8.65 \times 10^{-2}</math> (95 °C, 95% RH)</b> | <b><i>This work</i></b>                                            |

**Table S10.** Comparison of proton conductivity of SNFG before and after thermal annealing at 70 °C and 95 % RH.

| Before annealing (S cm <sup>-1</sup> ) | After annealing (S cm <sup>-1</sup> ) |
|----------------------------------------|---------------------------------------|
| $4.10 \times 10^{-2}$                  | $4.62 \times 10^{-2}$                 |

#### References:

1. D. Roy Chowdhury, C. Singh and A. Paul, *RSC Adv.*, 2014, **4**, 15138-15145.
2. P. Mehra, M. Wilson and A. Paul, *J. Phys. Chem. C*, 2022, **126**, 10534-10545.
3. L. G. Cançado, K. Takai, T. Enoki, M. Endo, Y. A. Kim, H. Mizusaki, A. Jorio, L. N. Coelho, R. Magalhães-Paniago and M. A. Pimenta, *Appl. Phys. Lett.*, 2006, **88**, 163106.
4. M. A. Pimenta, G. Dresselhaus, M. S. Dresselhaus, L. G. Cançado, A. Jorio and R. Saito, *Phys. Chem. Chem. Phys.*, 2007, **9**, 1276-1290.
5. Z. Luo, T. Yu, Z. Ni, S. Lim, H. Hu, J. Shang, L. Liu, Z. Shen and J. Lin, *J. Phys. Chem. C*, 2011, **115**, 1422-1427.
6. M. K. Rabchinskii, et al., *Sci. Rep.*, 2020, **10**, 6902.
7. P. Mehra, M. Wilson and A. Paul, *J. Phys. Chem. C*, 2022, **126**, 10534-10545.
